# Supplementary material for: Structural Properties of Zinc Oxide Nanorods Grown on Al-Doped Zinc Oxide Seed Layer and Their Applications in Dye-Sensitized Solar Cells
Source: Materials (Basel). 2014 Mar 28;7(4):2522–33. doi: 10.3390/ma7042522 (PMC5453348; doi:10.3390/ma7042522)
Supplement: Supplementary File 1 [file materials-07-02522-s001.pdf]

# Supplementary Information

**Table S1.** Zn2p<sup>3</sup>, O1s, C1s, and Zn/O ratio calculated from XPS spectra.

| Film | Zn2p      |       | O1s       |       | C1s       |       | Zn/O |
|------|-----------|-------|-----------|-------|-----------|-------|------|
|      | Peak (eV) | at%   | Peak (eV) | at%   | Peak (eV) | at%   |      |
| ZnO  | 1022.44   | 37.98 | 531.17    | 41.26 | 285.90    | 20.75 | 0.92 |
| AZO  | 1022.42   | 44.14 | 531.17    | 45.40 | 285.84    | 10.45 | 0.97 |

Note: Film thickness: 50 nm, Annealing temperature: 350 °C.

**Figure S1.** (a) XRD patterns and (b) relative intensity of (002) peak of the ZnO NRs grown on AZO seed layers with various seed annealing temperatures.

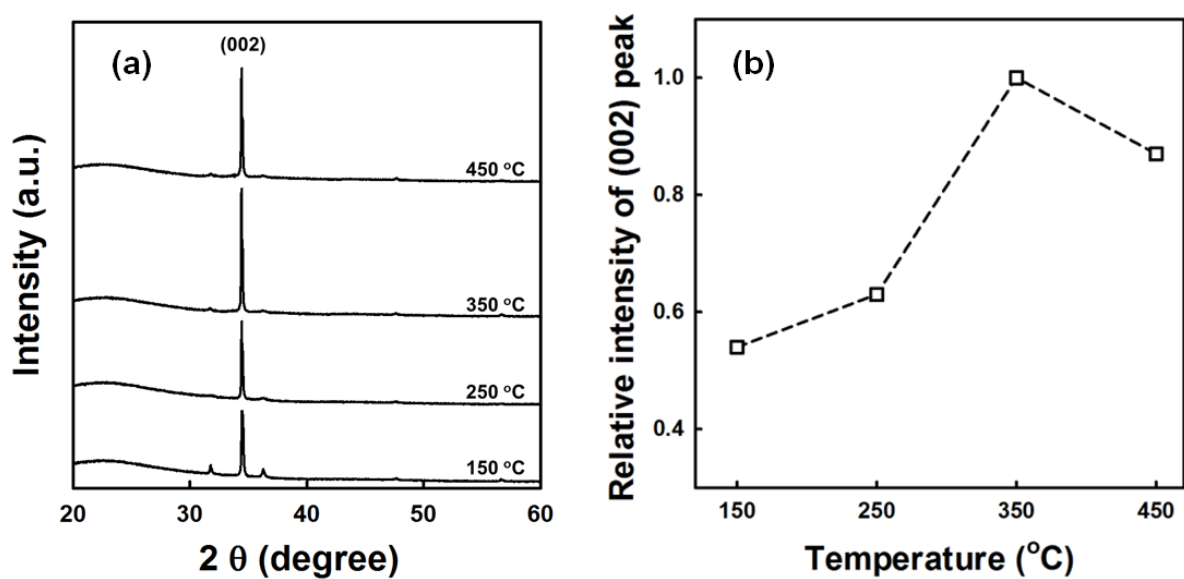

**Figure S2.** Cross-sectional FESEM images of (a) TiO<sub>2</sub>/ZnO NRs on FTO glass coated substrate and (b) its schematic diagram.

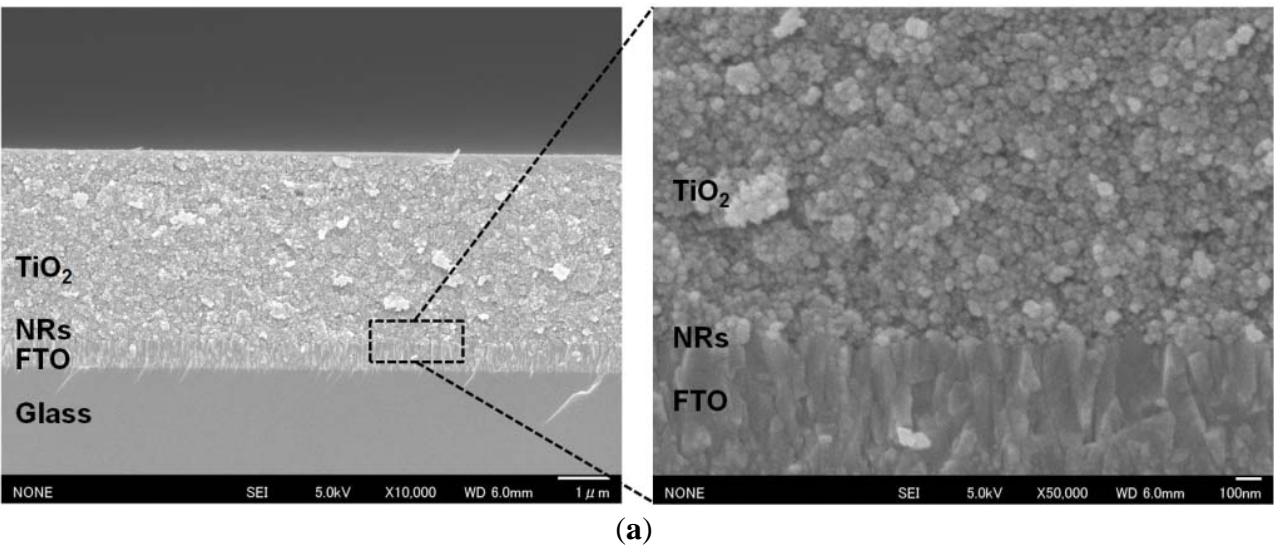

**Figure S2. Cont.**

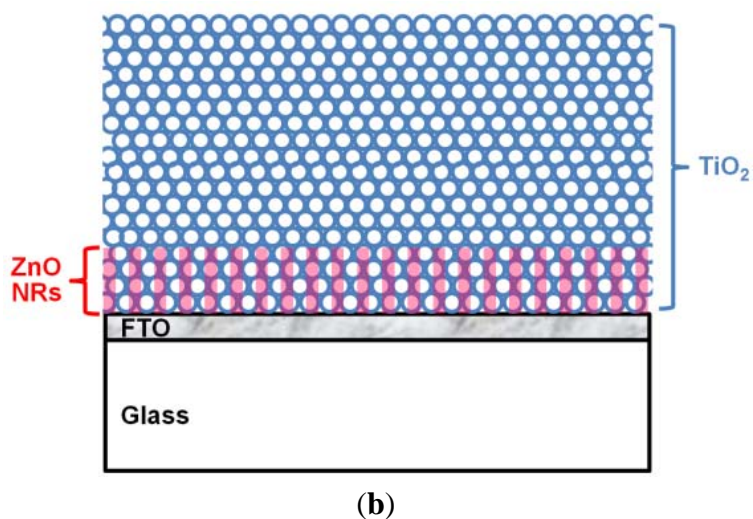

As seen, TiO<sub>2</sub> nanoparticles could effectively fill in the interspaces between ZnO nanorods.

**Figure S3.** XRD pattern of TiO<sub>2</sub>/ZnO NRs on FTO coated glass substrate.

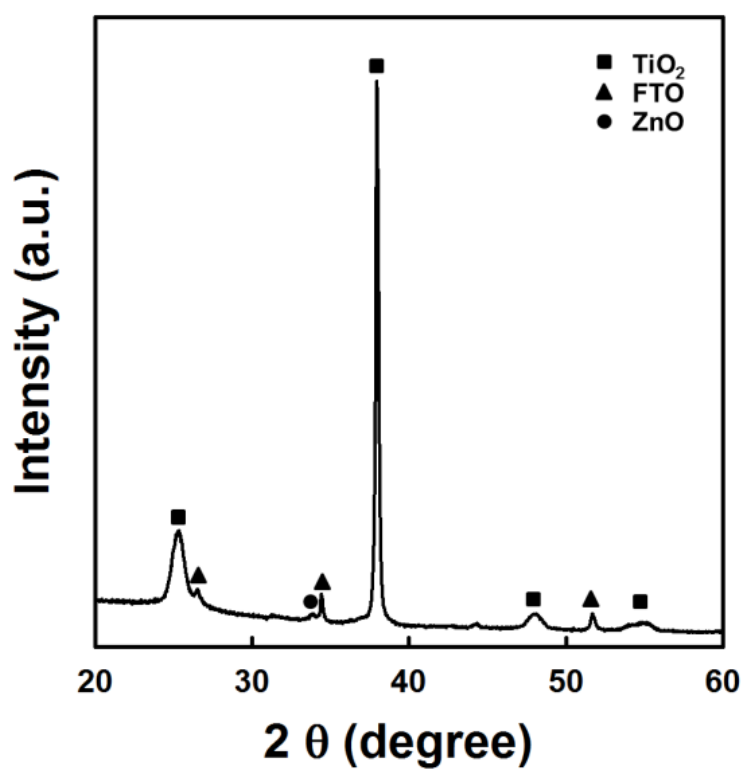

Diffraction peak corresponding to the hexagonal wurtzite structure of ZnO is clearly observed.
